# Supplementary material for: A water soluble fluorescent probe for selective and sensitive detection of picric acid – a nitroexplosive
Source: Royal Society of Chemistry journal article supplement (doi:10.1039/d3sd00184a), 2023-01-01
Supplement: d3sd00184a1.pdf [file d3sd00184a1.pdf]

## SUPPORTING INFORMATION

### A WATER SOLUBLE FLUORESCENT PROBE FOR SELECTIVE AND SENSITIVE DETECTION OF PICRIC ACID - A NITROEXPLOSIVE

Porchezhiyan Vadivel<sup>†</sup>, Kalaivani Dayanidhi <sup>†</sup>, and Noorjahan Sheik Eusuff <sup>†\*</sup>

<sup>†</sup> Department of Chemistry, Guru Nanak College (Autonomous), Velachery, Chennai,  
Tamil Nadu, India.

(The authors Porchezhiyan Vadivel and Kalaivani Dayanidhi contributed equally in this paper.)

\*Address correspondence to : Dr. S.E. Noorjahan,

Assistant Professor,

Department of Chemistry,

Guru Nanak College (Autonomous),

Affiliated to University of Madras,

Velachery, Chennai, Tamil Nadu, India,

E-mail: [senoorjahan@gmail.com](mailto:senoorjahan@gmail.com)

[noorjahan.se@gurunanakcollege.edu.in](mailto:noorjahan.se@gurunanakcollege.edu.in)

**Table S1. Optimization conditions for SAP oxidation**

| <b>Saponin (g)</b> | <b>Volume of water (mL)</b> | <b>Sodium periodate (g)</b> | <b>Time (h)</b> | <b>Temperature (°C)</b> |
|--------------------|-----------------------------|-----------------------------|-----------------|-------------------------|
| 1                  | 100                         | 0.2 to 1.8                  | 2               | 35                      |
| 1                  | 100                         | 1.2                         | 1 to 6          | 35                      |
| 1                  | 100                         | 1.2                         | 4               | 35 to 55                |
| 1                  | 100                         | 1.2                         | 4               | 45                      |

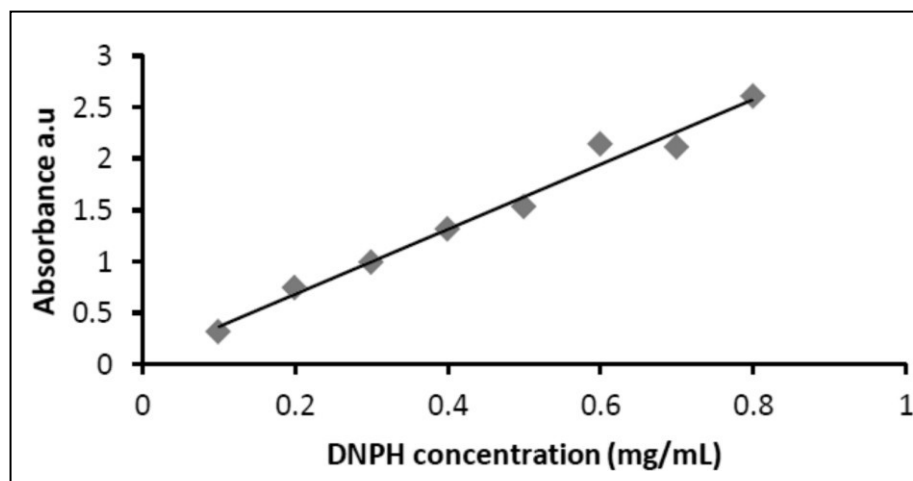

**Fig. S1. The calibration graph of DNPH**

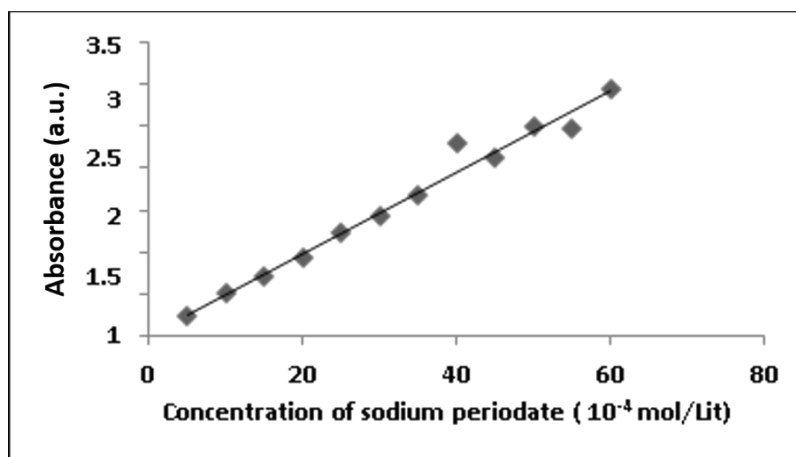

**Fig. S2.** The calibration graph of Periodate

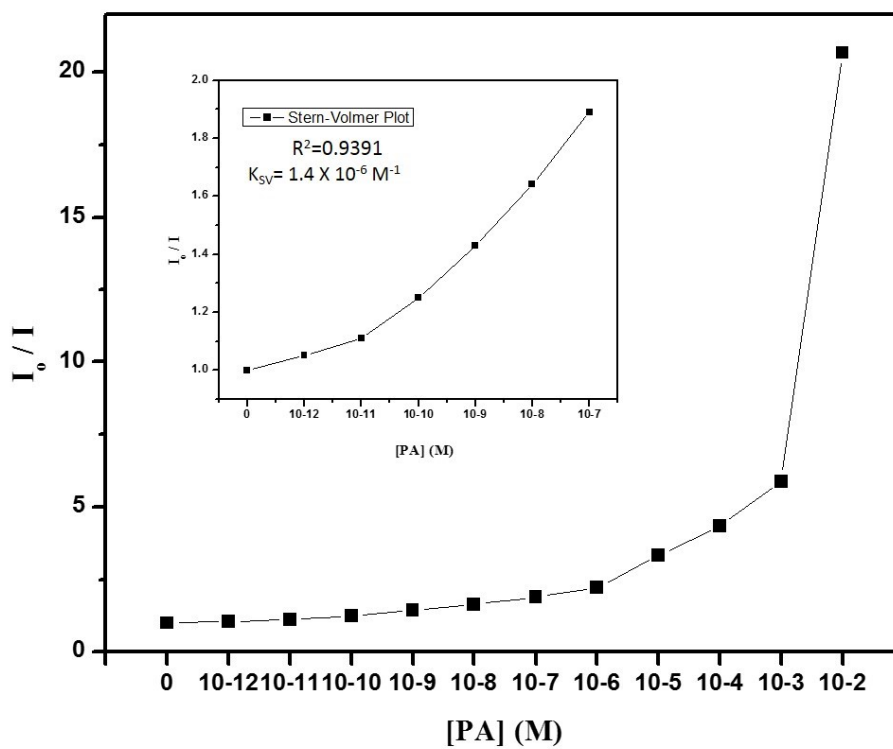

**Fig. S3.** Stern–Volmer plots for sensor-SAPAL-PY using PA as a quencher. Inset: Stern–Volmer plots at lower concentration region of PA.

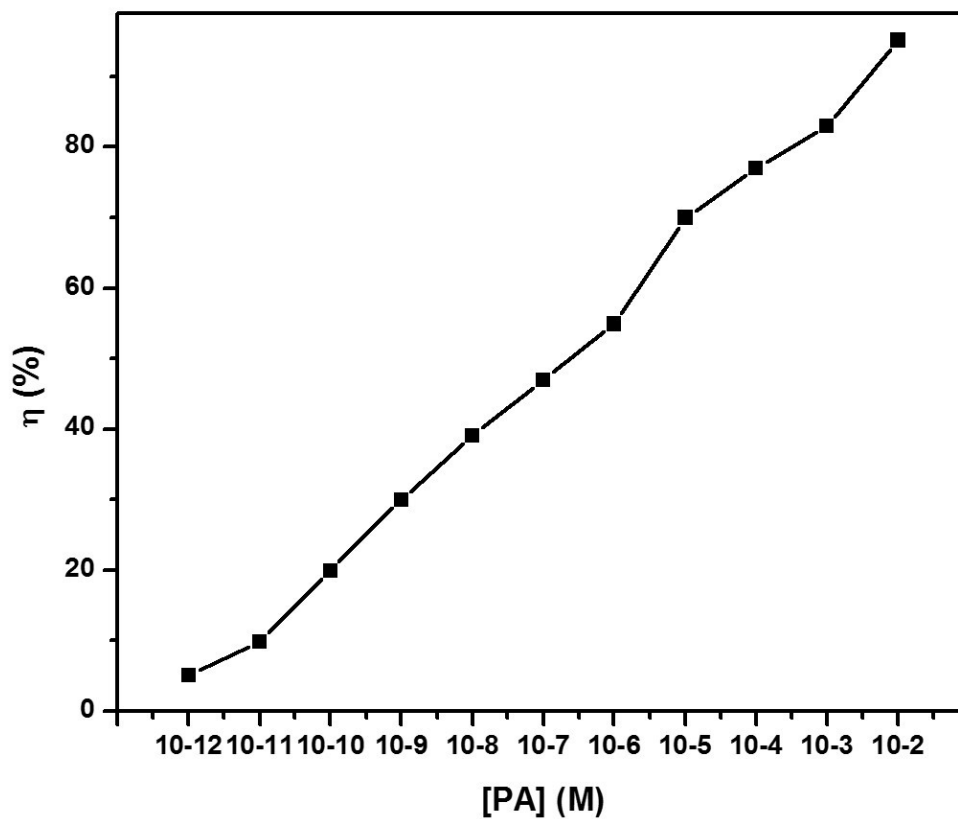

**Fig. S4. Quenching plots of SAPAL-PY as a function of PA concentration.**

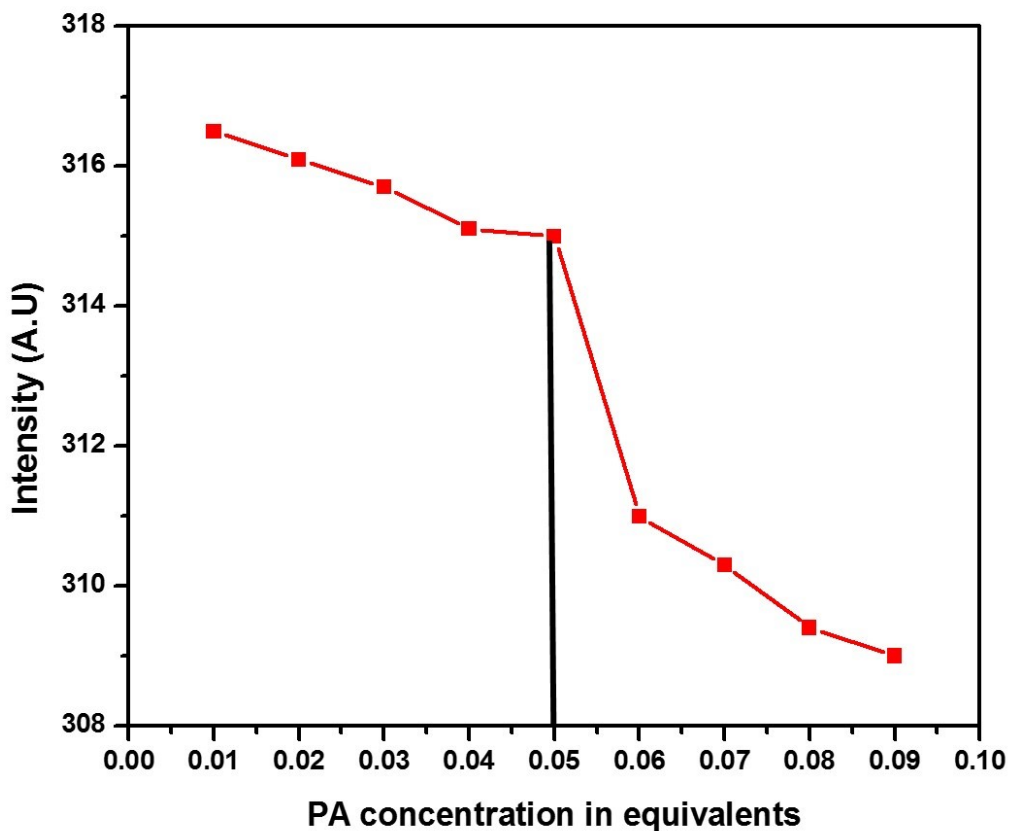

**Fig. S5. Fluorescence intensity of SAPAL-PY as a function of PA concentration.**

To determine the detection limit, fluorescence intensity of SAPAL-PY with picric acid as a function of picric acid concentration was plotted. From the plotted graph, the concentration at which a sharp or steep change in fluorescence intensity observed was multiplied with the concentration of SAPAL-PY gave the detection limit.

$$DL = CL \times CT$$

$C_L$  = concentration of SAPAL-PY ( $1 \times 10^{-8} \text{ M L}^{-1}$ )

$C_T$  = concentration of PA at which sharp change occurred.

Therefore, detection limit,

$$DL = 1 \times 10^{-8} \text{ M L}^{-1} \times 0.05 \text{ equiv}$$

$$= 5 \times 10^{-10} \text{ ML}^{-1}$$

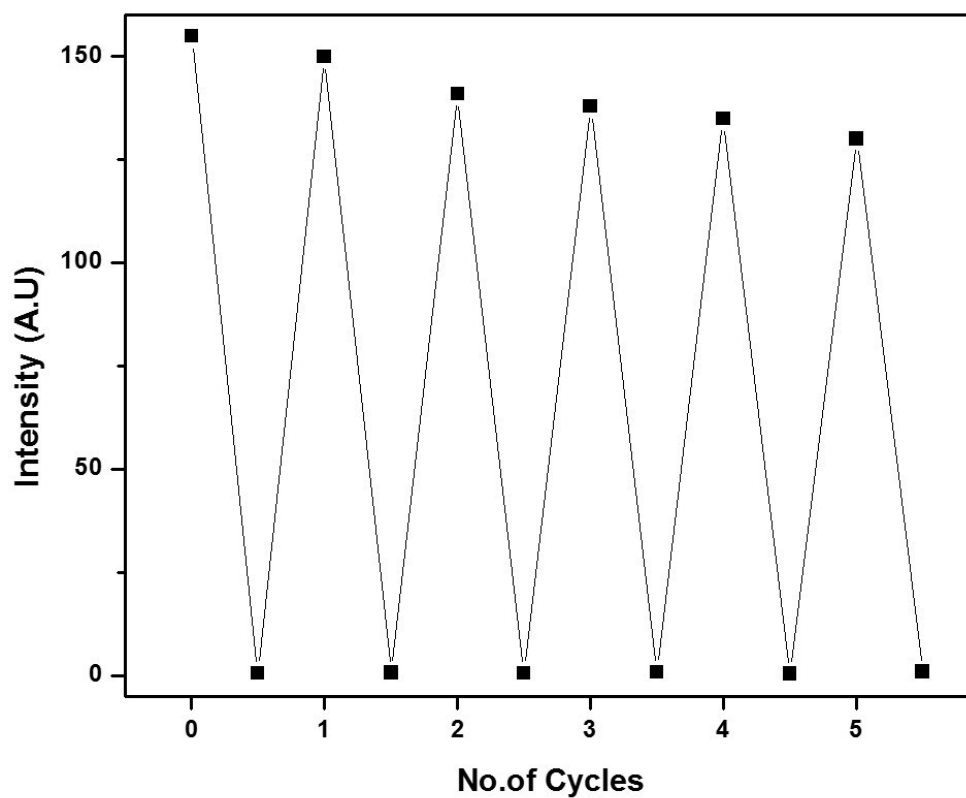

**Fig. S6. Reversibility of sensing film to PA**
